# Supplementary material
Source: publisher site journal article supplement (https://www.dovepress.com/article/487598)
Supplement: Supplementary file 1 [file get_supplementary_file.php]

**EXPERIMENTAL SECTION**

**Instruments**

Transmission electron microscopy (TEM) images were obtained on a Titan G2 transmission electron microscope (FEI, Hillsboro, OR, USA). The zeta potential and hydrodynamic size of the nanoparticles were determined after dilution with distilled deionized water by a Malvern Zetasizer Nano ZS (Malvern Panalytical, Malvern, UK). UV-Visible spectroscopic analysis was performed using a UV-2450 spectrophotometer (Shimadzu Corporation, Kyoto, Japan). The confocal images of the study were obtained by a Leica SP8 confocal microscope (Leica Microsystems, Germany) with a 40× water immersion objective lens. The *in vivo* imaging experiments were conducted by an *in vivo* imaging system (InVivo Smart-LF, VISQUE). Histological slides were digitized using a Pannoramic SCAN slide scanner (3DHISTECH Ltd., Budapest, Hungary).

**Endo-lysosome escape of siIRF1@ZIF@HM NPs in M1 macrophages**

RAW 264.7 macrophages were seeded in a 35 mm confocal dish and treated with 100 ng/mL LPS and 20 ng/mL IFN-γ for 48 h for M1 macrophage induction. After washing with PBS, the cells were incubated with 40 μg/mL siIRF1@ZIF@HM at 37 °C for 4 h. Subsequently, the endo-lysosomes were stained with 50 nM Lyso-Tracker Green (Beyotime) for 10 min, while nuclei were stained with 1× Hoechst 33342 staining solution for live cells (Beyotime) for 10 min. The cells were then washed with PBS three times and observed with confocal laser scanning microscopy.

**Targeting Mechanism Assay**

To study the targeting mechanisms, CXCL9 in BMDMs and CXCR3 on the surface of hybrid membrane were pre-blocked. BMDMs were firstly treated with 100 ng/mL LPS and 50 ng/mL IFN-γ for 48 h to induce M1 polarization. For CXCL9 pre-blockade, BMDMs were incubated with 10 μg/mL CXCL9 antibody for 2 h. Subsequently, 40 μg/mL siIRF1@ZIF@HM NPs were added to the cell culture for 4 h. For CXCR3 pre-blockade, siIRF1@ZIF@HM NPs were incubated with CXCR3 antibody for 2 h and were then added to M1-polarized BMDMs for 4 h.

**Enzyme Linked Immunosorbent Assay (ELISA)**

The level of Creatine Kinase MB Isoenzyme (CK-MB) in mouse serum was measured using ELISA kit from Elabscience, according to the manufacturer’s instructions. The blood samples were collected 21 days after EAM induction. Serum samples were isolated by centrifugation at 9,000 g for 20 min and stored at -80 ºC prior to further analysis.

**Blood biochemistry analysis**

The blood samples were collected after treatment and the concentrations of aspartate aminotransferase (AST), alanine aminotransferase (ALT), triglyceride (TG), total cholesterol (TC), creatine kinase (CK), and creatinine (CREA) in mouse serum from different groups were quantified by commercial colorimetric assay kits (Elabscience).

**Purification of cell culture supernatant proteins**

The proteins in the cell culture supernatants were extracted using a previously described methanol/chloroform precipitation method. Briefly, the supernatants were first collected and centrifuged to remove any cell debris. Subsequently, 500 μL of supernatant from each group was transferred into new tubes and mixed with 500 μL of methanol and 125 μL of chloroform by vortexing for 30 seconds, followed by centrifugation at 13,000 g for 5 min. The resulting upper aqueous phase was removed, being careful not to touch the protein layer. Another 500 μL of methanol was introduced, followed by vortexing and centrifugation at 13,000 g for 5 min. The resulting pellets were dried at 55 ºC for 5 min before adding 40 μL of 1×loading buffer and vortexing. Finally, the samples were boiled at 95 ºC for 10 min and subjected to Western blotting analysis.

**Transfection of siRNA**

The J774A.1 macrophages were transfected with IRF1 siRNA or negative control siRNA using LipofectamineTM RNAiMAX Transfection Reagent (Invitrogen, CA, USA) in Opti-MEM media. The IRF1 siRNA duplexes comprised a sense strand sequence of 5′-CAGAUCCCAAGACAUGGAATT-3′ and an antisense strand sequence of 5′-UUCCAUGUCUUGGGAUCUGTT-3′, which was synthesized by GenePharma (Shanghai, China). After the transfecting incubation for 12 h, the cell culture medium was changed for the following treatments.

**Immunofluorescence**

To perform myocardial immunofluorescence, cryosections were subjected to equilibration to room temperature for 15 min followed by fixation in 90% ethanol for 5 min. The frozen sections were washed three times with PBS for 3 min, and then incubated with blocking solution combined with 0.3% Triton X-100 for 1 h. For macrophage immunofluorescence after various treatments, cells on the coverslips or confocal dishes were washed with ice-cold PBS and fixed in 4% paraformaldehyde solution for 20 min. Subsequently, the cells were permeabilized with 0.1% Triton X-100 and blocked with normal blocking goat serum solution (ZLI-9056, ZSGB-BIO, Beijing, China). After blocking, both myocardial tissue sections and cells were incubated with primary antibodies overnight at 4 ºC, followed by PBS washing and incubation with secondary antibodies at room temperature for 1 h. The cell nuclei were stained with DAPI, and the immunofluorescence was observed using a fluorescence microscope. The mean fluorescence intensity was quantified using Image J software version 1.5.1.


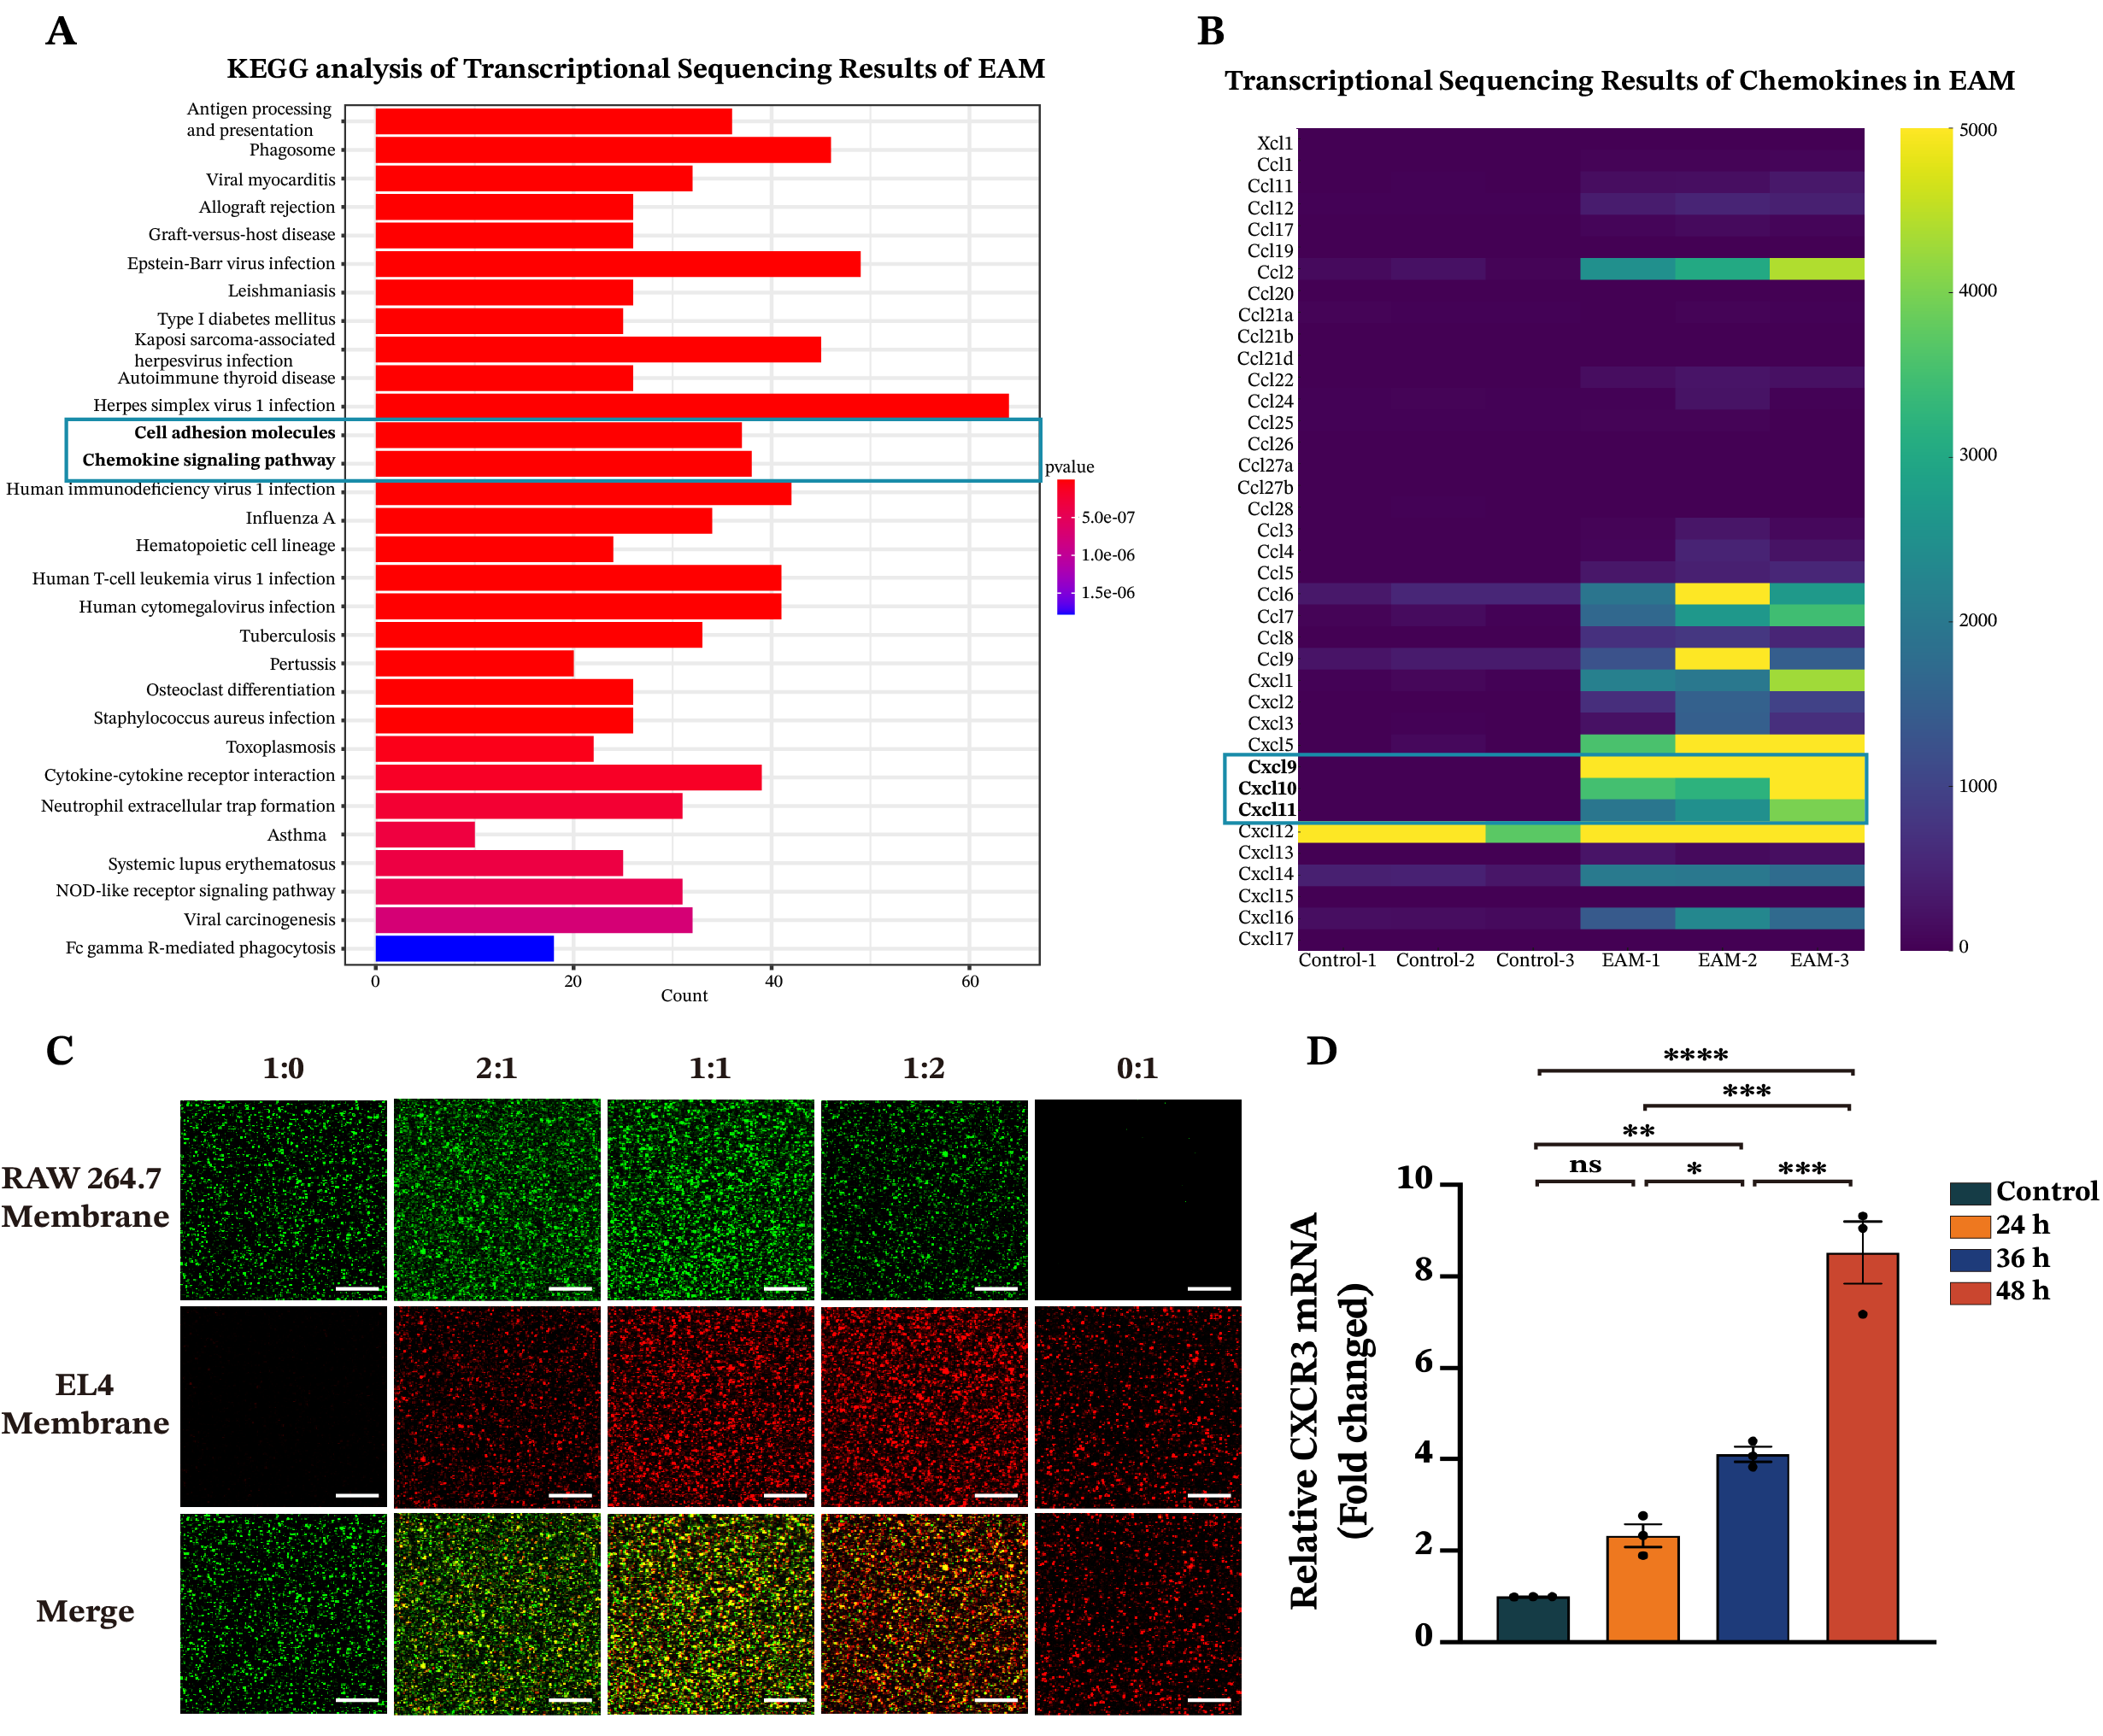


**Figure S1.** (A and B) The transcriptomic analysis of myocarditis tissue.(C) Confocal images of the hybrid membrane at different fusion ratios. (D) The mRNA level of CXCR3 in EL4 cells stimulated with 50 ng/mL PMA for different time durations determined by qPCR. Data were presented as mean ± SEM (n=3). Scale bar: 50 μm. **P* < 0.05, ***P* < 0.01, ****P* < 0.001, *****P* < 0.0001; ns, not significant.

**
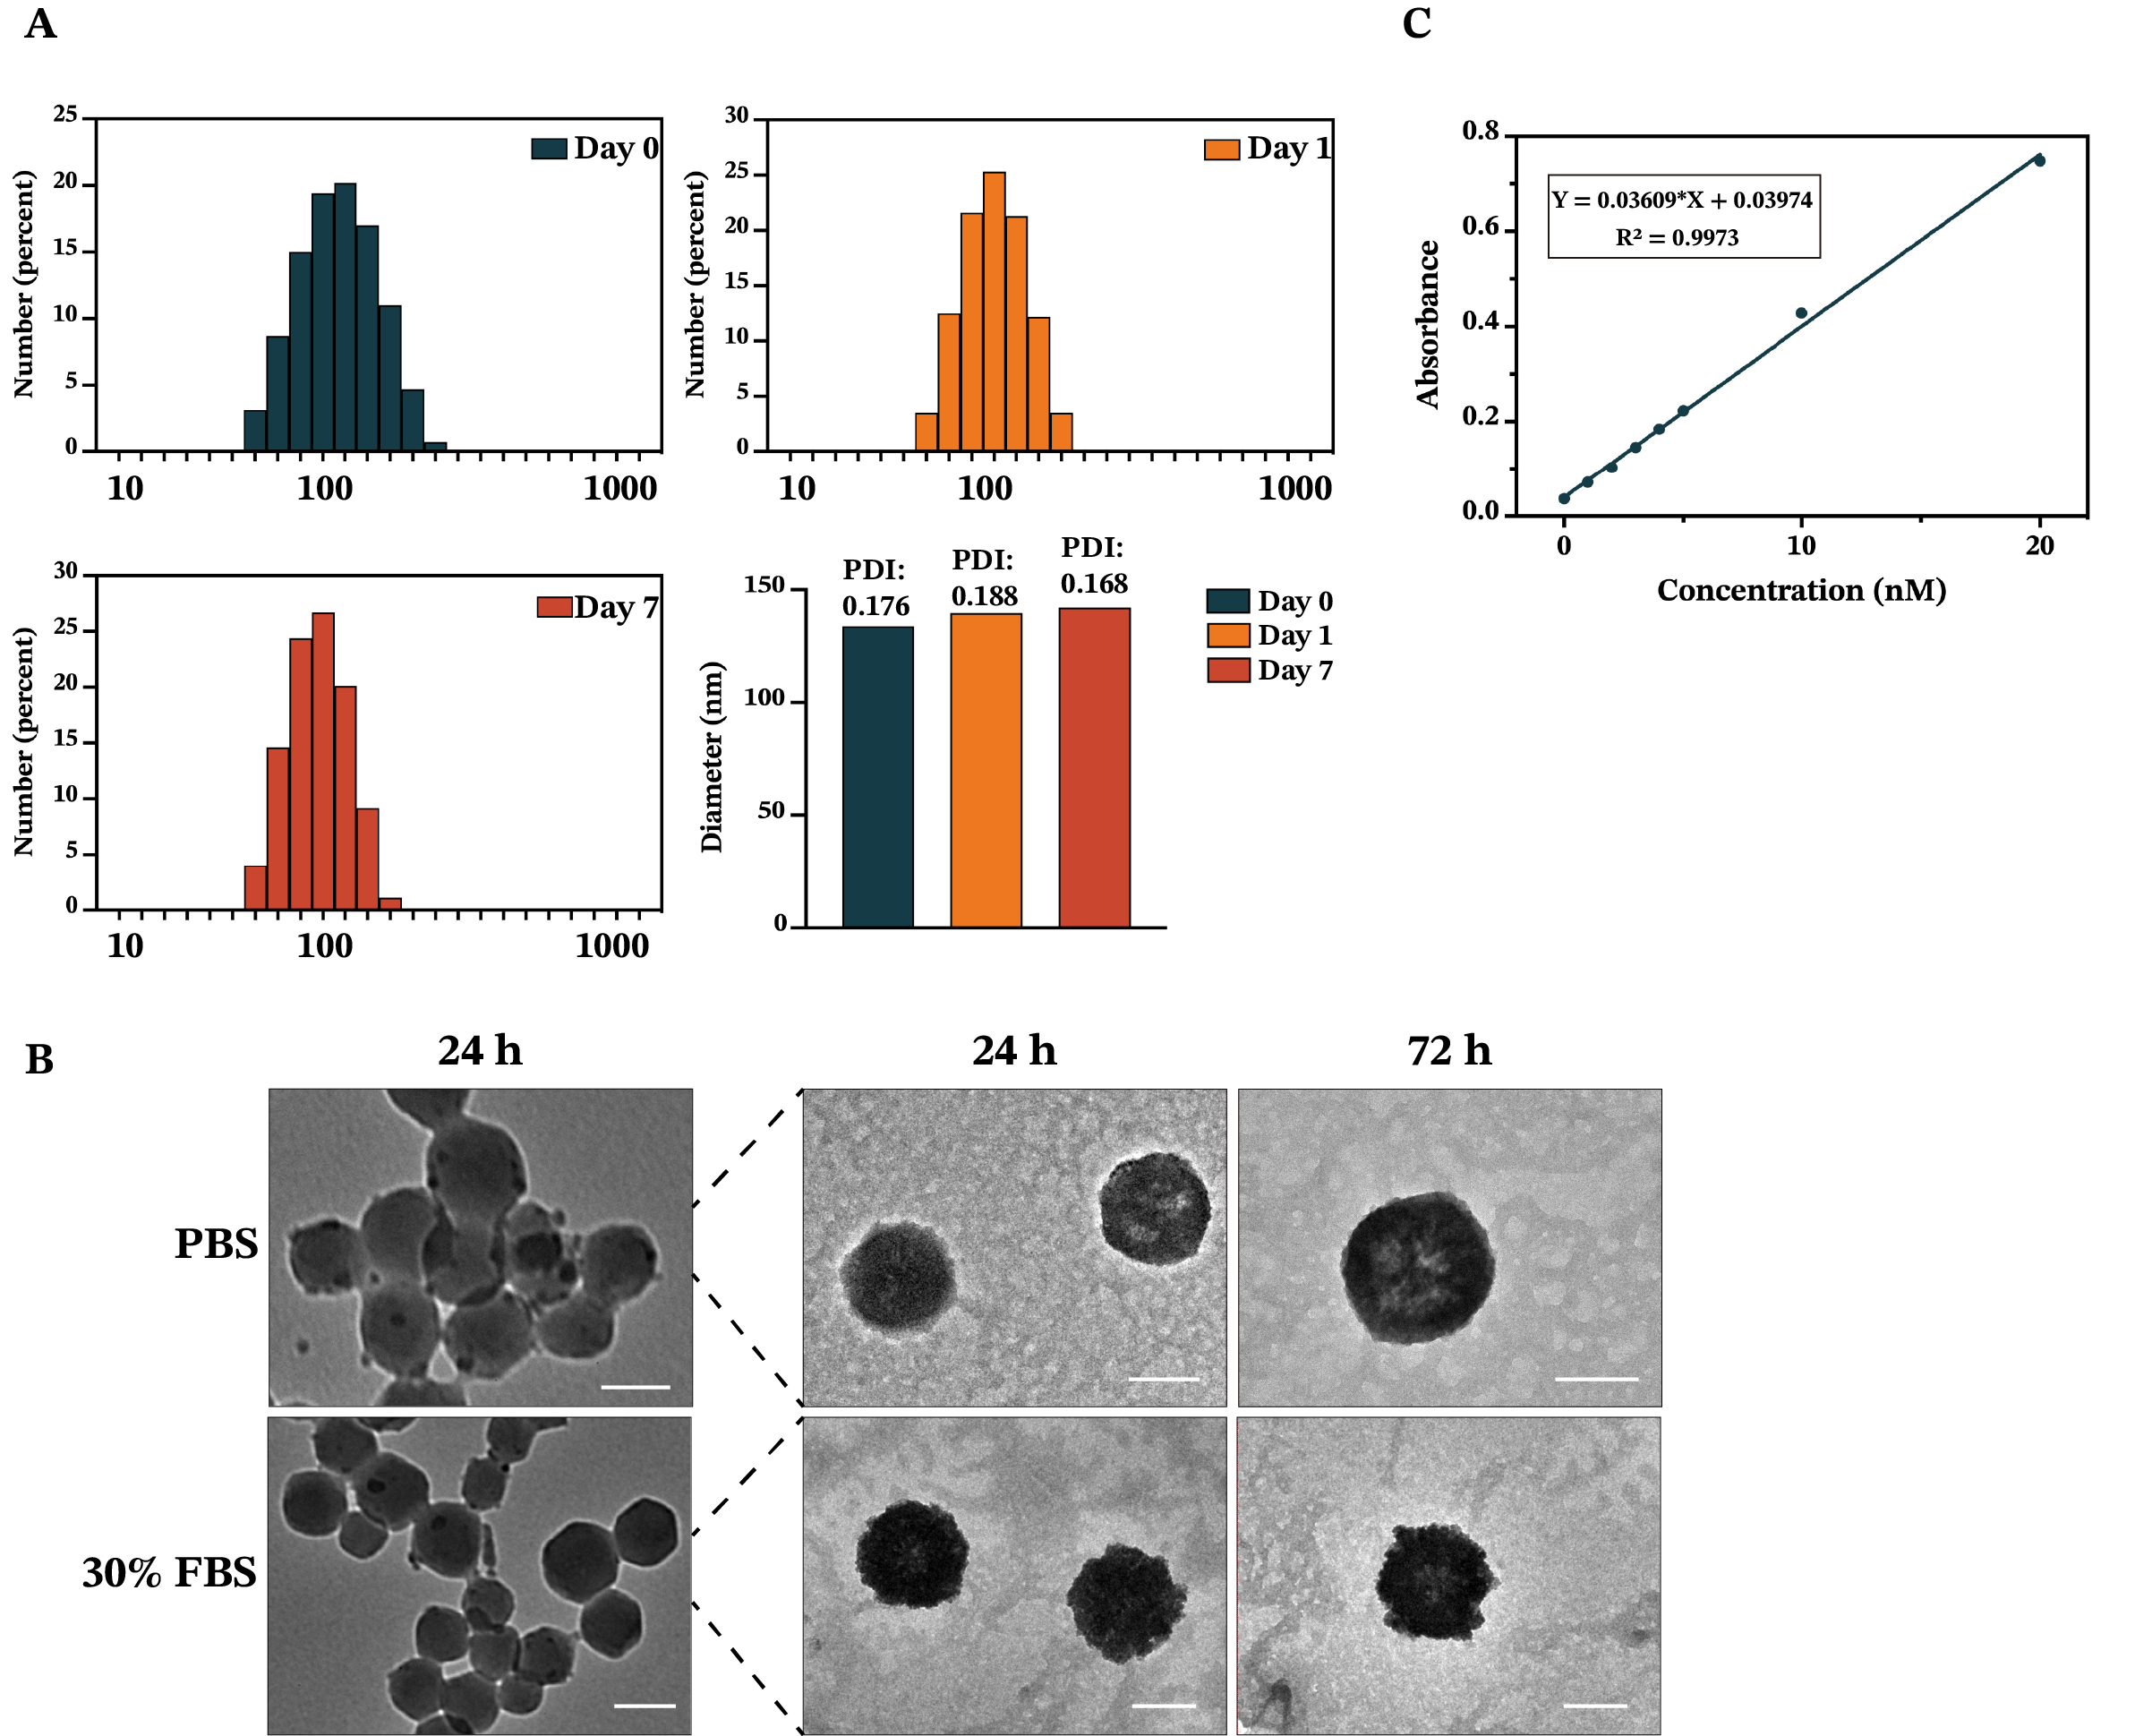
**

**Figure S2.** (A) Hydrodynamic diameter of siIRF1@ZIF@HM NPs after storing in PBS (pH 7.4) for 0, 1, and 7 days determined by dynamic light scattering (DLS). (B) TEM images of siIRF1@ZIF NPs and siIRF1@ZIF@HM NPs after storing in PBS (pH 7.4) and 30% FBS buffers for 24 and 72 h. (C) Calibration curve of the absorbance with various concentrations of Cy5-labeled siIRF1 for the drug loading capacity (DLC) calculation.

**
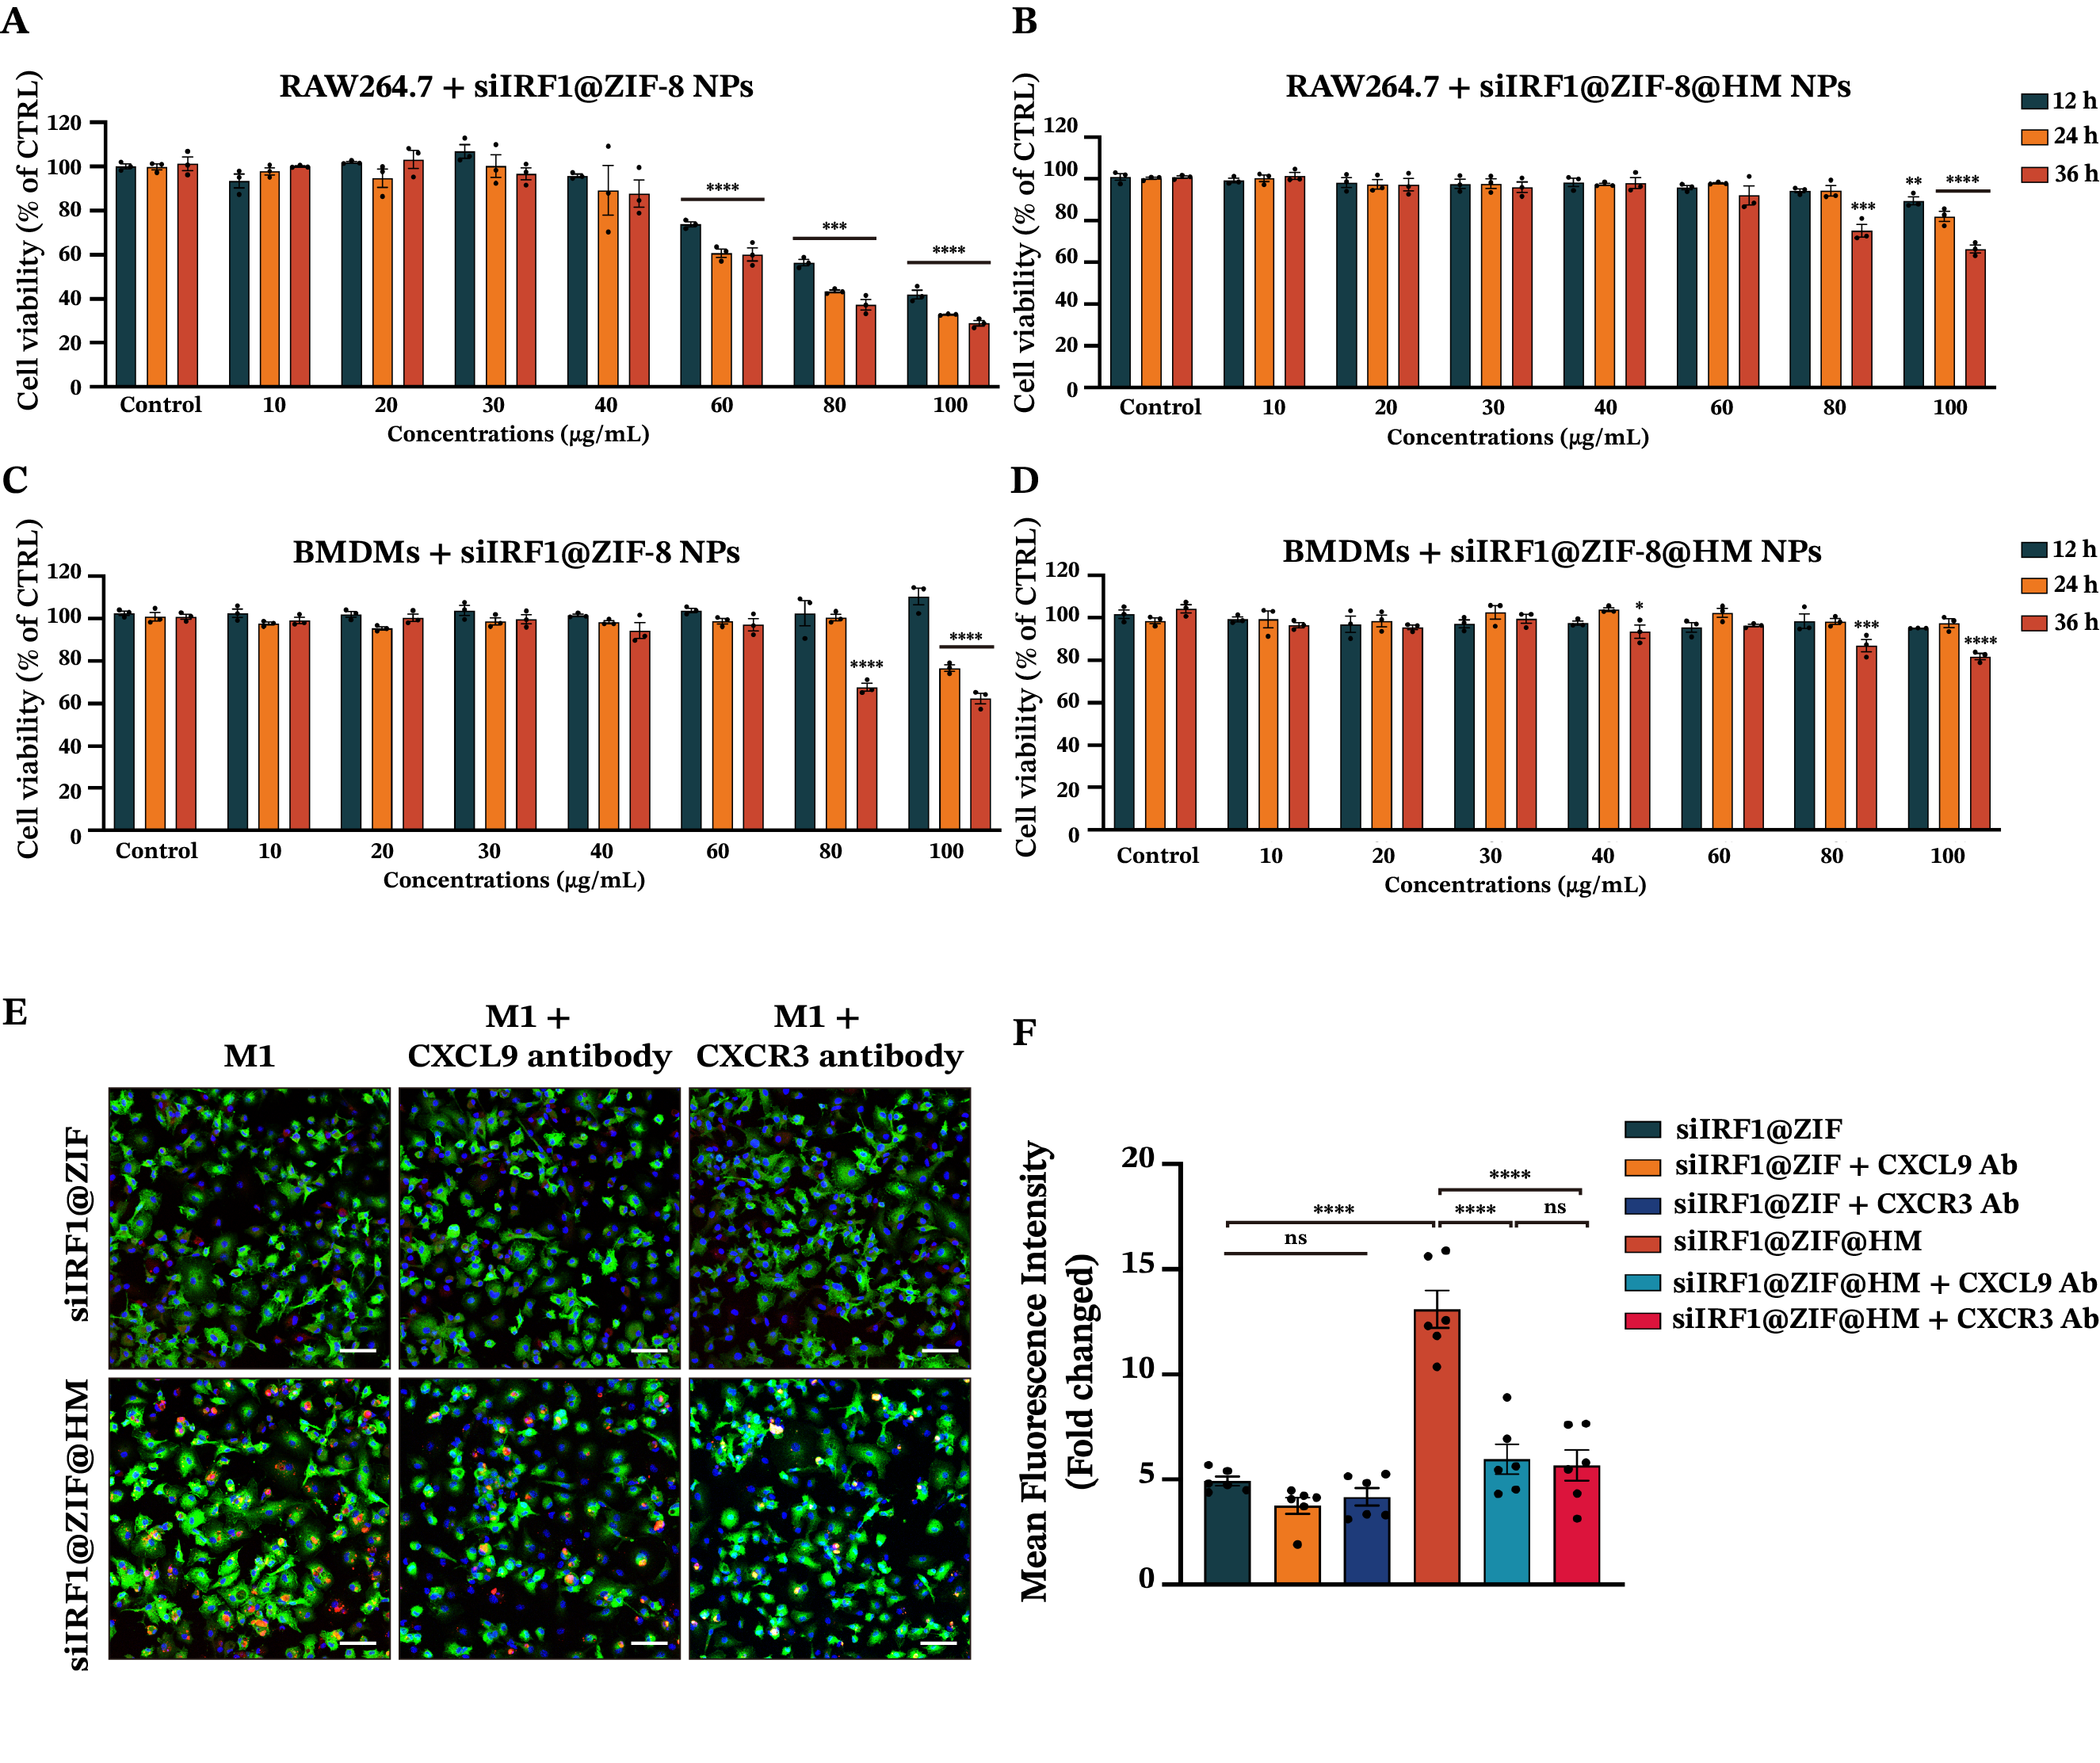
**

**Figure S3.** (A-D) Cytotoxicity of siIRF1@ZIF NPs and siIRF1@ZIF@HM NPs on RAW264.7 macrophages and BMDMs after incubation with different concentrations and durations. (E) Confocal fluorescence images of macrophages for cellular uptake detection. BMDMs were pretreated with LPS (100 ng/mL) and IFN-γ (50 ng/mL) for 48 h to induce M1 polarization. Cells were then incubated with 40 μg/mL of siIRF1@ZIF NPs or siIRF1@ZIF@HM NPs for 4 h with or without antibody pre-block. CD68 and iNOS were visualized by immunofluorescence staining, and siIRF1 was tracked with Cy5 fluorescence labeling. (F) Quantifications of mean fluorescence intensity. Data were presented as mean ± SEM (n=3). Scale bar: 50 μm. **P* < 0.05, ***P* < 0.01, ****P* < 0.001, *****P* < 0.0001; ns, not significant.

**
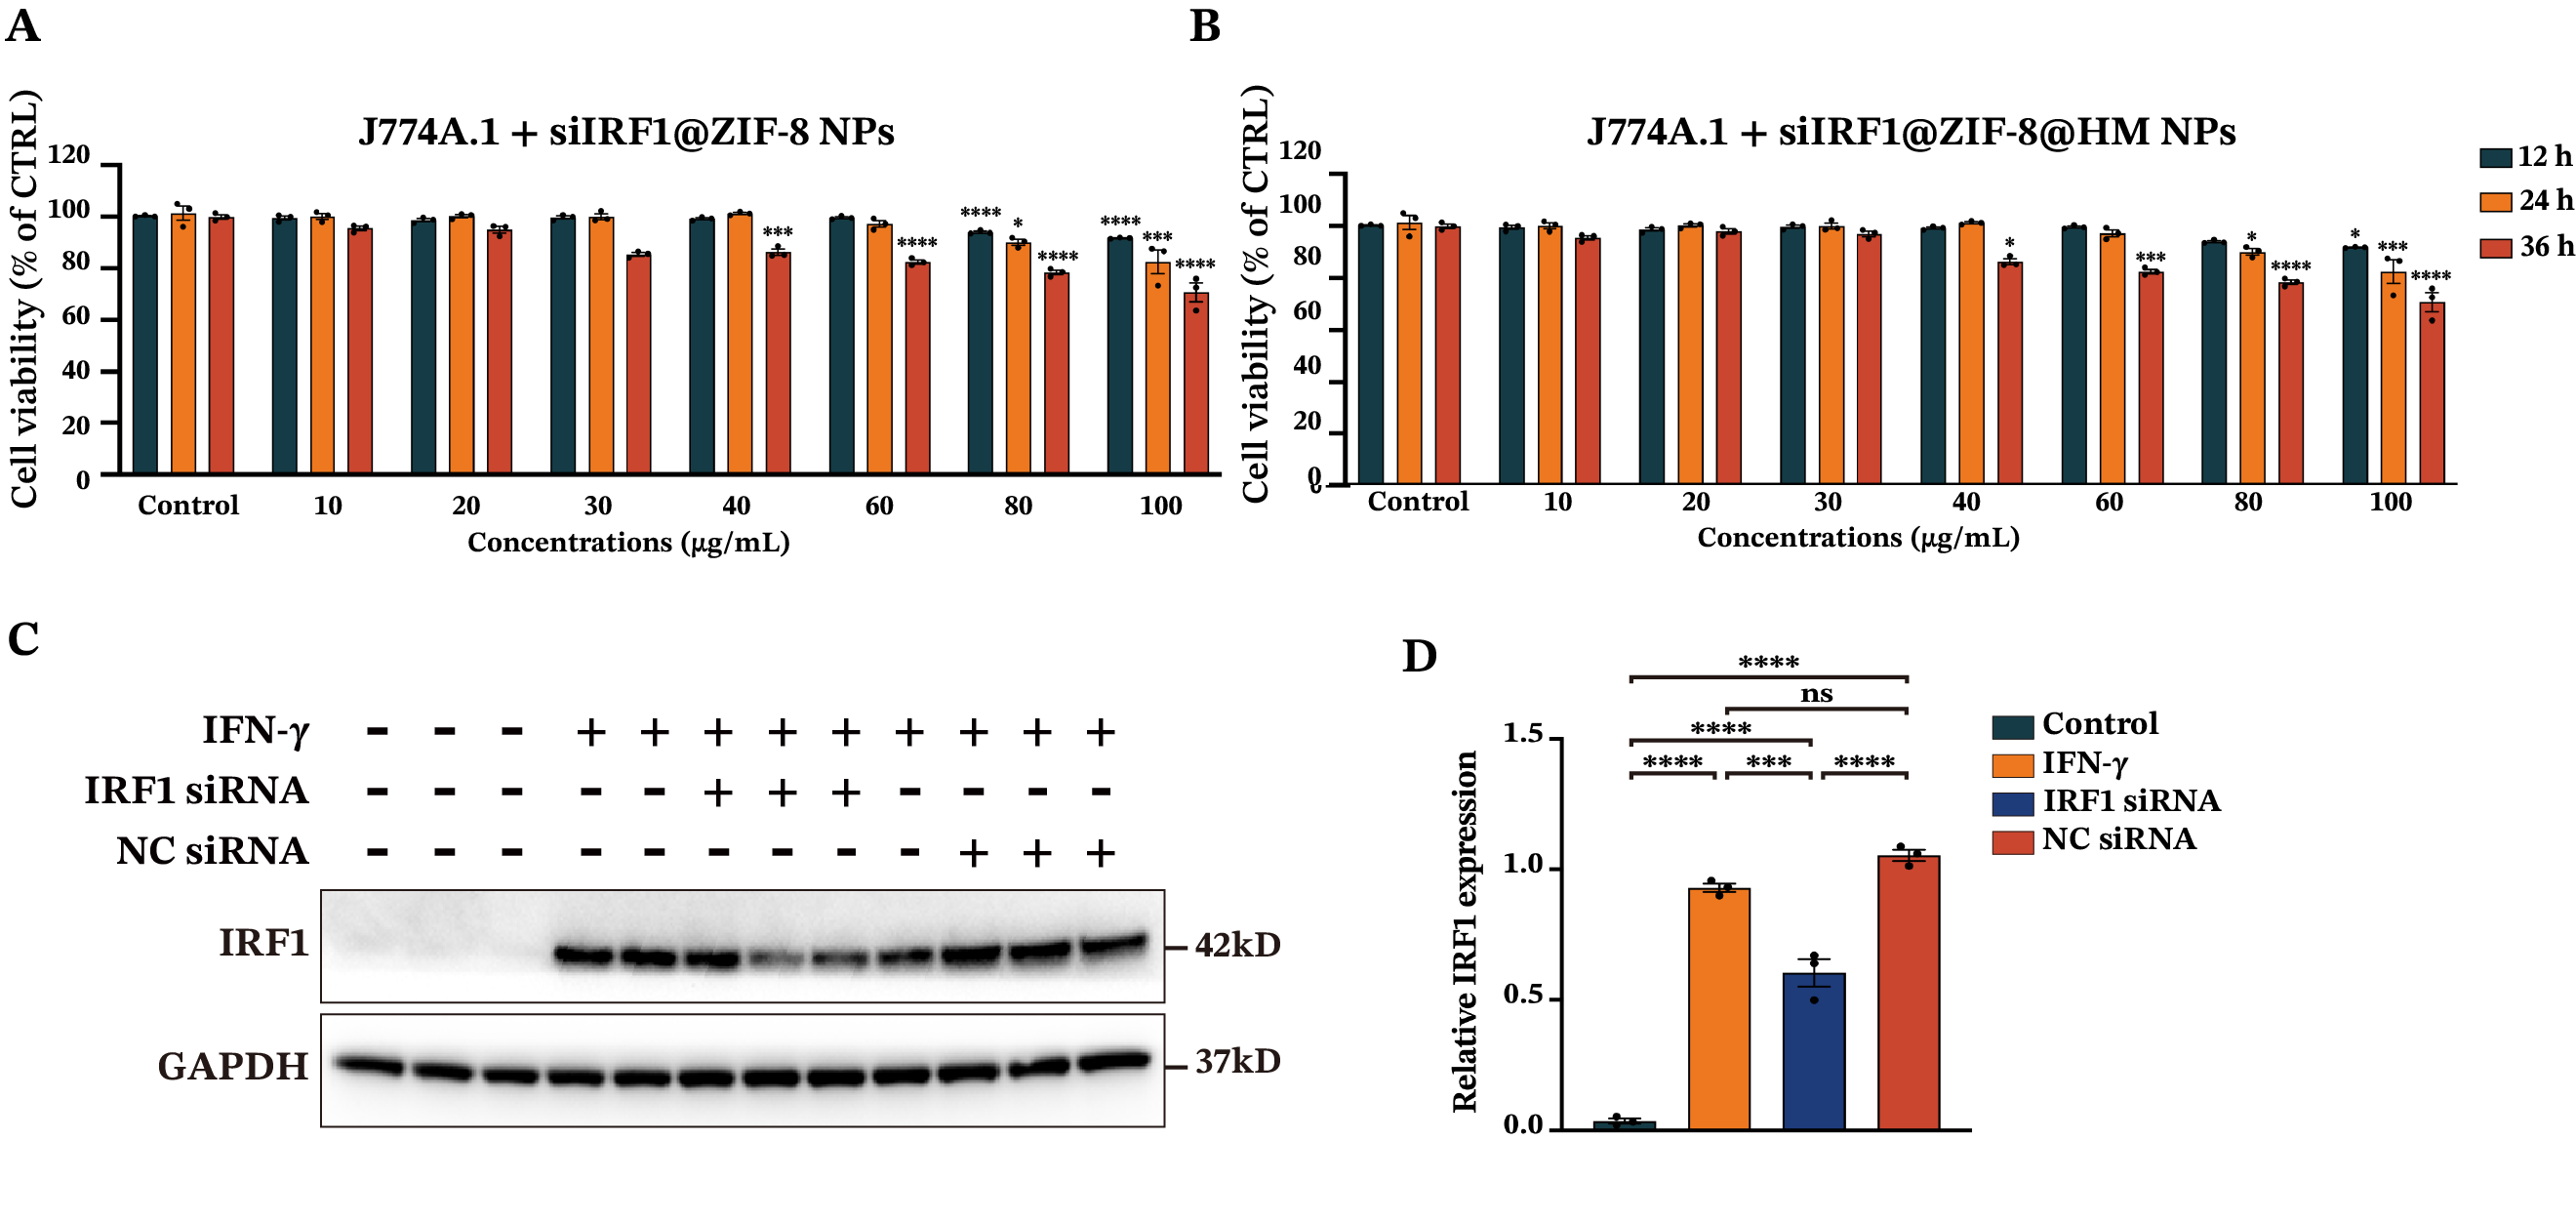
**

**Figure S4.** (A and B) Cytotoxicity of siIRF1@ZIF NPs and siIRF1@ZIF@HM NPs on J774A.1 macrophages after incubation with different concentrations and durations. (C and D) The knockdown efficacy of siIRF1 in J774A.1 macrophages treated with IFN-γ. The J774A.1 macrophages were transfected with IRF1 siRNA or negative control siRNA, followed by 50 ng/mL IFN-γ incubation for 48 h. Data were presented as mean ± SEM (n=3). **P* < 0.05, ****P* < 0.001, *****P* < 0.0001; ns, not significant.

**
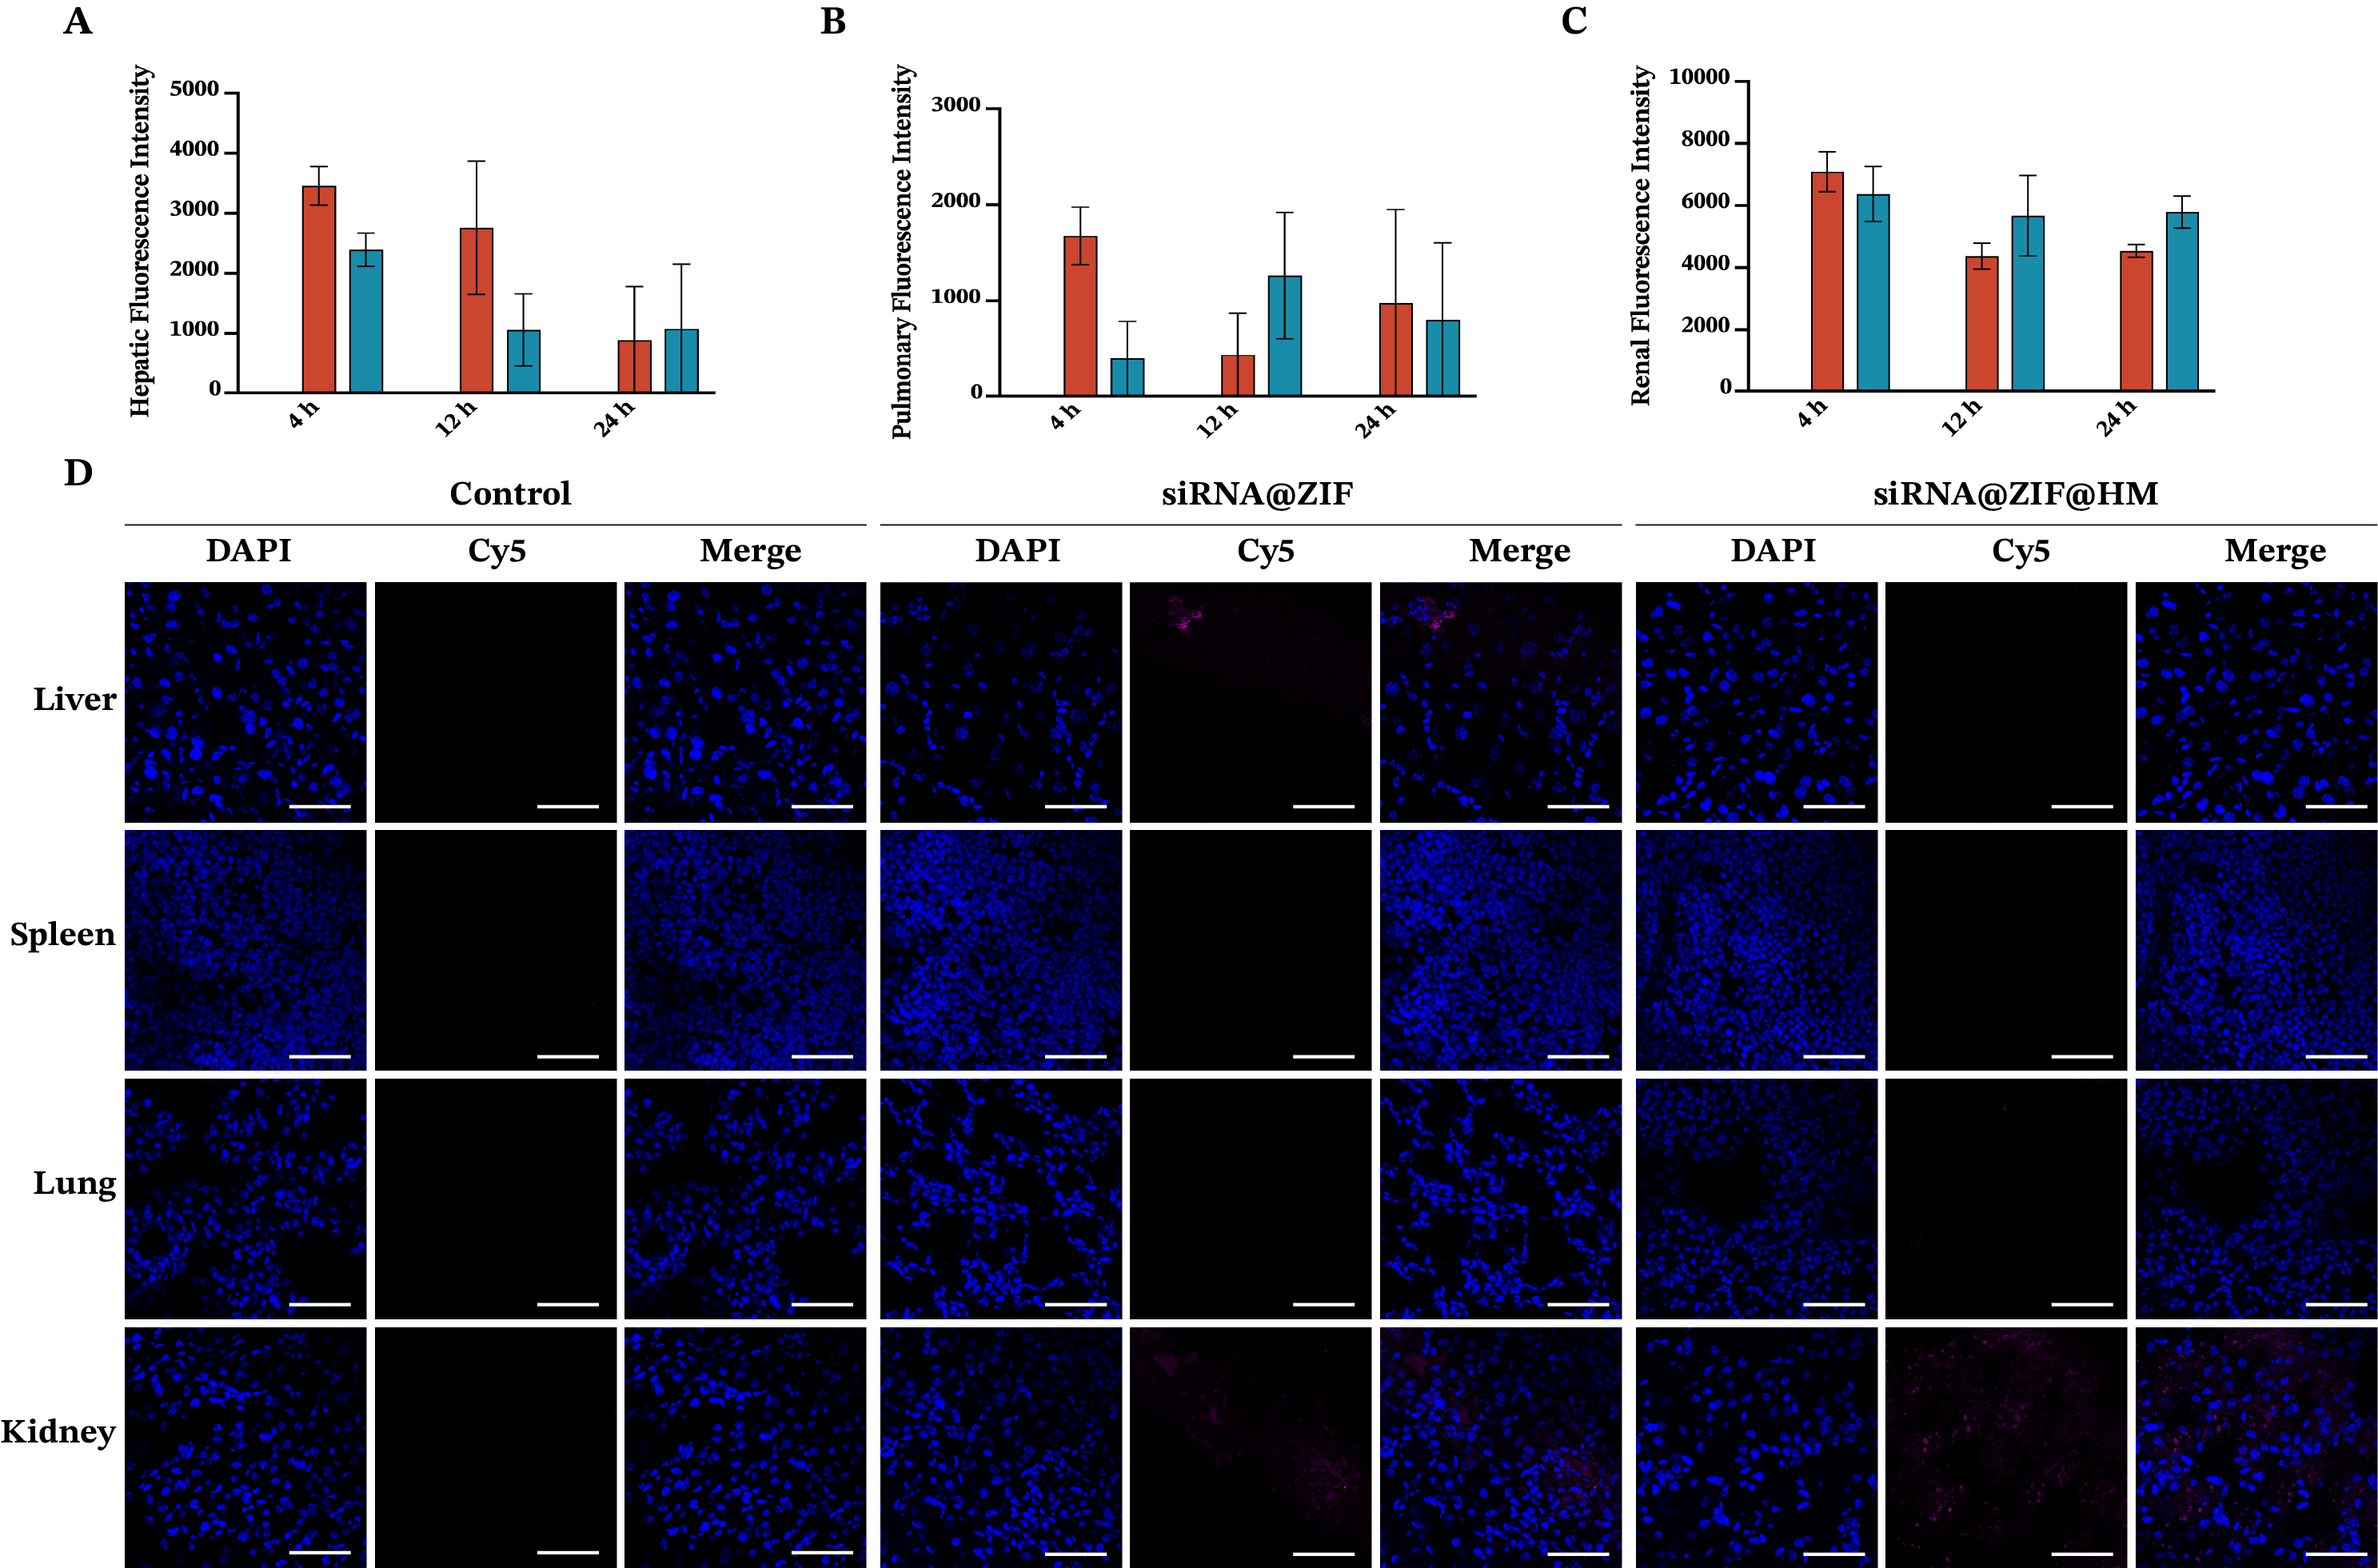
**

**Figure S5. The biodistribution of siIRF1 in the major organs.** (A-C) Quantifications fluorescence intensity of the liver, lung, and kidney after intravenous injection of PBS, siIRF1@ZIF NPs, and siIRF1@ZIF@HM NPs in EAM Balb/c mice. (D) Confocal images to observe the biodistribution of siIRF1. Cryosections of the liver, spleen, lung, and kidney were stained with DAPI and observed with confocal microscopy. Data were presented as mean ± SEM (n=3). Scale bar: 50 μm.

**
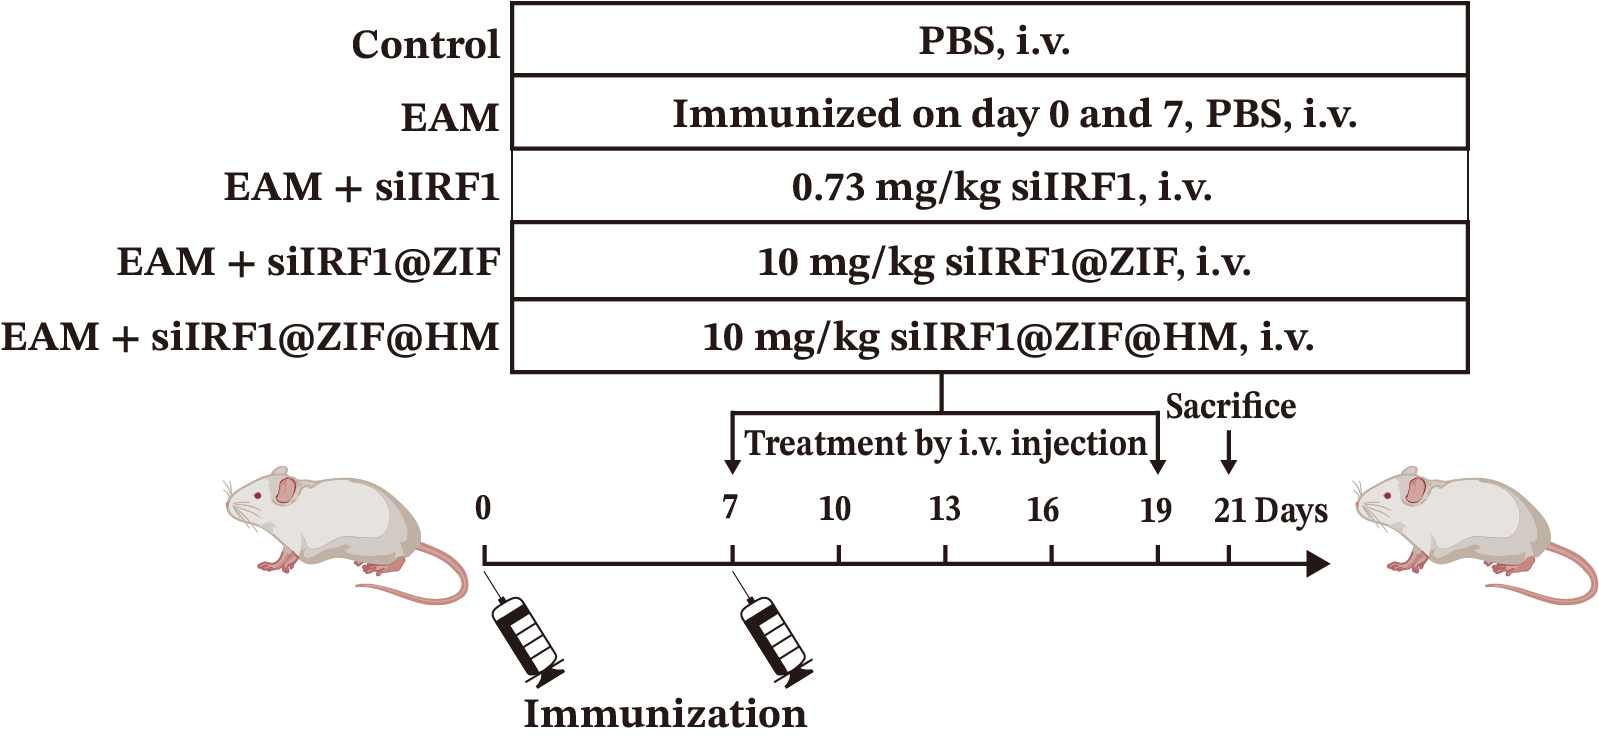
**

**Figure S6. Schematic illustration of the treatment protocols to evaluate the therapeutic efficacy of siIRF1-loaded nanoparticles.**

**
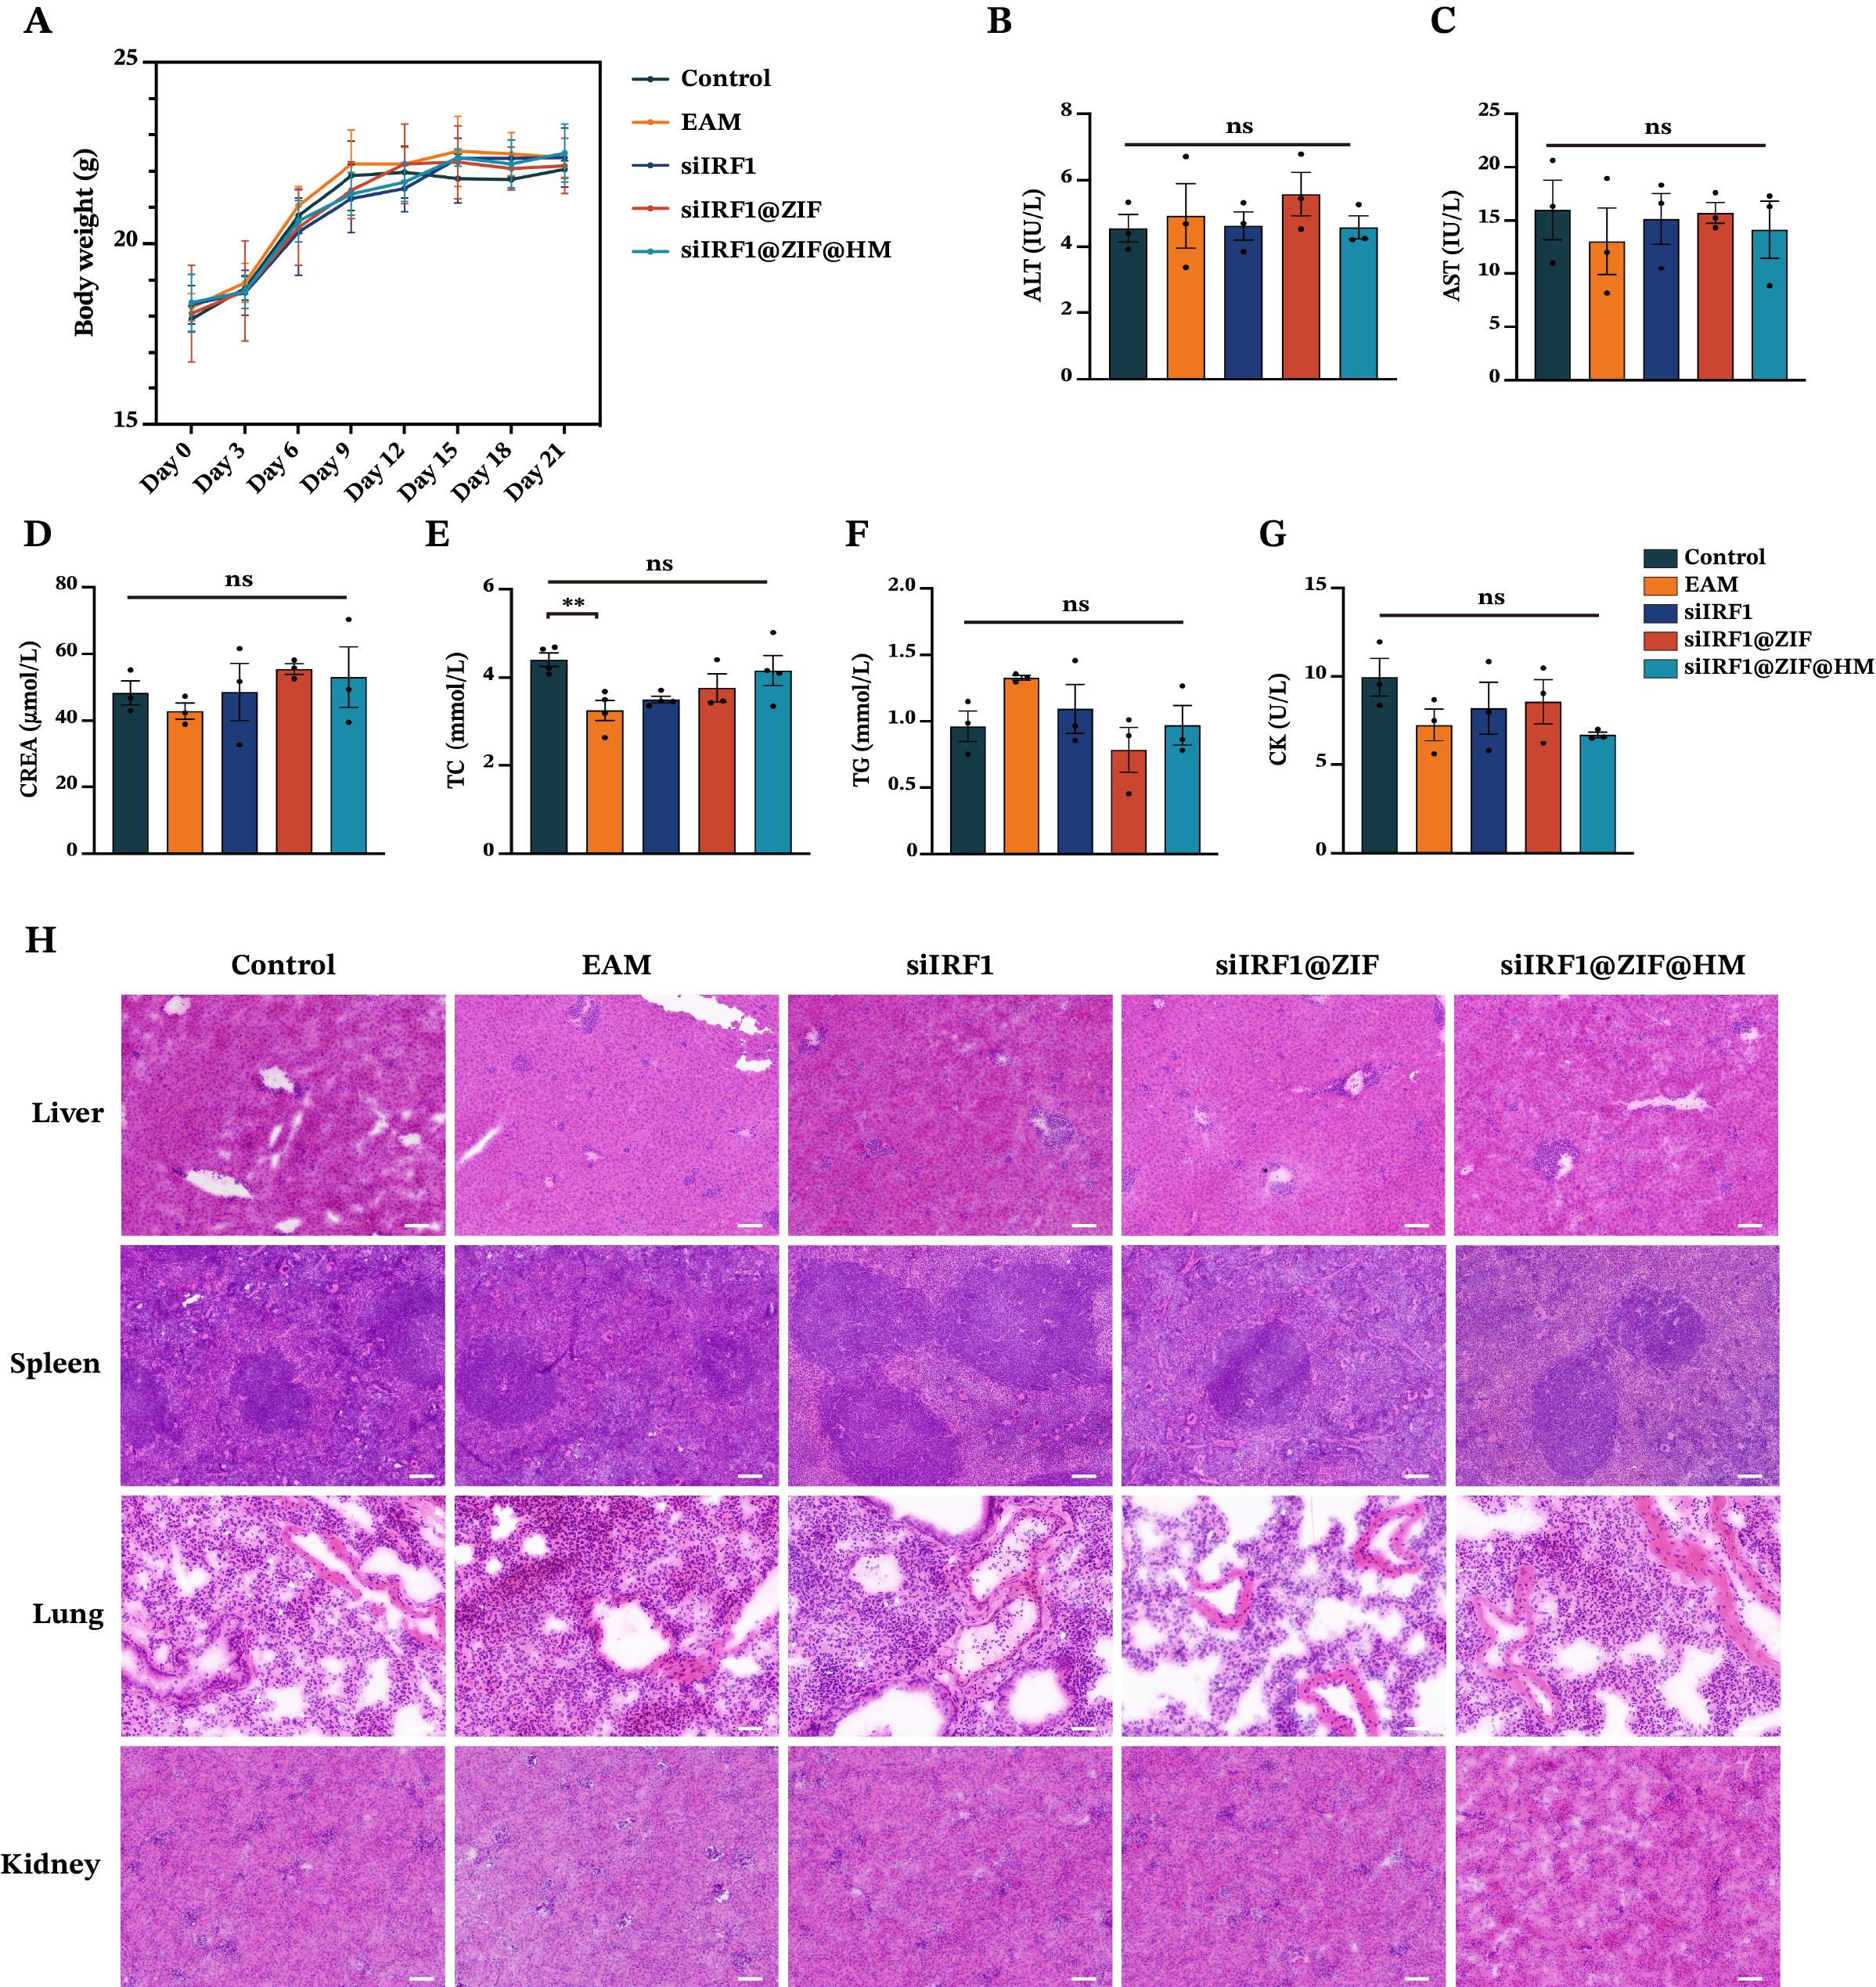
**

**Figure S7. The *in vivo* biosafety evaluation of siIRF1 nano-therapies.** (A) The body weights of Balb/c mice from different groups during treatment. (B-D) The biochemical assays of hepatic and renal functions. ALT, alanine aminotransferase, AST, aspartate aminotransferase, and CREA, creatinine. (E-G) The serum metabolic profile. (H) Representative images of HE staining of the main organs (liver, spleen, lung, and kidney) from mice after various treatments. Scale bar: 100 μm. TC, total cholesterol, TG, triglyceride, CK, creatine kinase. Data were presented as mean ± SEM (n=3). ***P* < 0.01; ns, not significant.

**Table S1.** List of mouse gene primers for qRT-PCR.

| **Gene** | **Forward primer** | **Reverse primer** |
| --- | --- | --- |
| IRF1 | ATGCCAATCACTCGAATGCG | TTGTATCGGCCTGTGTGAATG |
| CXCL9 | TCCTTTTGGGCATCATCTTCC | TTTGTAGTGGATCGTGCCTCG |
| CXCL10 | CCAAGTGCTGCCGTCATTTTC | GGCTCGCAGGGATGATTTCAA |
| CXCL11 | GGCTTCCTTATGTTCAAACAGGG | GCCGTTACTCGGGTAAATTACA |
| CXCR3 | TACCTTGAGGTTAGTGAACGTCA | CGCTCTCGTTTTCCCCATAATC |
| CASP1 | ACAAGGCACGGGACCTATG | TCCCAGTCAGTCCTGGAAATG |
| ZBP1 | AAGAGTCCCCTGCGATTATTTG | TCTGGATGGCGTTTGAATTGG |
| GBP1 | ACAACTCAGCTAACTTTGTGGG | TGATACACAGGCGAGGCATATTA |
| TNF-α | CCCTCACACTCAGATCATCTTCT | GCTACGACGTGGGCTACAG |
| IL-1β | GCAACTGTTCCTGAACTCAACT | ATCTTTTGGGGTCCGTCAACT |
| IL-6 | TAGTCCTTCCTACCCCAATTTCC | TTGGTCCTTAGCCACTCCTTC |
| GAPDH | AGGTCGGTGTGAACGGATTTG | TGTAGACCATGTAGTTGAGGTCA |

**Table S2.** Histological scoring standard of myocardial inflammation.

| **Score** | **Pathological standard** |
| --- | --- |
| 0 | No inflammation |
| 1 | Less than 10% of the myocardial cross-section involved |
| 2 | 10 to 30% involved |
| 3 | 30 to 50% involved |
| 4 | 50 to 90% involved |
| 5 | More than 90% involved |
